# Supplementary material
Source: PubMed Central journal article supplement (PMC8364490)

## A Reciprocal translocation

### *ATF1(ex3)-EWSR1(ex8)*

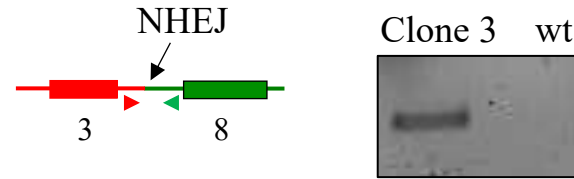

|         | <i>ATF1</i>                | <i>EWSR1</i>                |
|---------|----------------------------|-----------------------------|
| wt      | CTCTCCATTGGCC <b>CCATA</b> | <b>CACATCTTTAGGGCAT</b> GGC |
| clone 3 | CTCTCCATTGGCC <b>CCATA</b> | <b>CACATCTTTAGGGCAT</b> GGC |

### *CREB1(ex6)-EWSR1(ex8)*

|          | <i>CREB1</i>                    | <i>EWSR1</i>                        |
|----------|---------------------------------|-------------------------------------|
| wt       | GTTGAATATGGGTTT <b>CCTGAG</b>   | <b>CACATCTTTAGGGCAT</b> GGCAT       |
| clone 35 | GTTGAATATGGGTTT <b>CCTGAG</b>   | -16bp GGCAT                         |
| clone 84 | GTTGAATATGGGTTT <b>CCT</b> -3bp | +2bp (AA) -9bp <b>AGGGCAT</b> GGCAT |

### *ATF1(ex4)-EWSR1(ex8)*

|          | <i>ATF1</i>                       | <i>EWSR1</i>                  |
|----------|-----------------------------------|-------------------------------|
| wt       | AGTAGTCTGCAGTTA <b>CCAAGT</b>     | <b>CACATCTTTAGGGCAT</b> GG    |
| clone 44 | AGTAGTCTGCAGTTA <b>CCA</b> -3bp   | -2bp <b>CATCTTTAGGGCAT</b> GG |
| clone 47 | AGTAGTCTGCAGTTA <b>CCAAG</b> -1bp | -3bp <b>ATCTTTAGGGCAT</b> GG  |

## B Unrearranged alleles

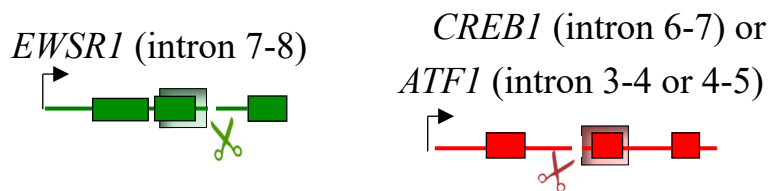

### *EWSR1* (intron 7-8, chr22:29,287,135-29,288,605)

|          |                                                 |         |
|----------|-------------------------------------------------|---------|
| wt       | GTTTGCTTTTGGGAATCCAGGACACATCTTTAGGGCATGGCATTCCA |         |
| clone 35 | TCGAAC ATCTTTAGGGCATGGCATTCCA                   | -141 bp |
| clone 84 | GTTTGCTTTTGGGAATCCAGGA ACATCTTTAGGGCATGGCATTCCA | -1 bp   |

### *CREB1* (intron 6-7, chr2:207,575,455-207,577,504)

|          |                                           |         |
|----------|-------------------------------------------|---------|
| wt       | ATATGGGTTTCTTGAGGAGCAAGTTACTTGAATATATTAGA |         |
| clone 35 | ATATGGGTTTCTTGAG CAAGTTACTTGAATATATTAGA   | -3 bp   |
| clone 84 | TACAATG AGCAAGTTACTTGAATATATTAGA          | -337 bp |

### *EWSR1* (intron 7-8, chr22:29,287,135-29,288,605)

|         |                                                 |       |
|---------|-------------------------------------------------|-------|
| wt      | GTTTGCTTTTGGGAATCCAGGACACATCTTTAGGGCATGGCATTCCA |       |
| clone 3 | GTTTGCTTTTGGGAATCCAGGA ACATCTTTAGGGCATGGCATTCCA | -1 bp |

### *ATF1* (intron 3-4, chr12:50,796,010-50,809,455)

|         |                                                         |        |
|---------|---------------------------------------------------------|--------|
| wt      | AACCTCTCCATTGGCCATACGCAGCACAACCTTATCCGTGTTCCCAAGTACTCAT |        |
| clone 3 | AACCTCTCCATT AGCACAACCTTATCCGTGTTCCCAAGTACTCAT          | -11 bp |

### *EWSR1* (intron 7-8, chr22:29,287,135-29,288,605)

|          |                                               |        |
|----------|-----------------------------------------------|--------|
| wt       | GCTTTTGGGAATCCAGGACACATCTTTAGGGCATGGCATTCCAGC |        |
| clone 44 | GCTTTTGGGAATCCAGGA ACATCTTTAGGGCATGGCATTCCAGC | -1 bp  |
| clone 47 | AGCCAC ATCTTTAGGGCATGGCATTCCAGC               | -76 bp |

### *ATF1* (intron 4-5, chr12:50,809,590-50,814,009)

|          |                                                         |       |
|----------|---------------------------------------------------------|-------|
| wt       | GTAGTCTGCAGTTACCAAGTAGAAGTGCATTCATACCTGTTTTAGTAAATAGTGT |       |
| clone 44 | GTAGTCTGCAGTTACCAAGTAGAAGTGCATTCATACCTGTTTTAGTAAATAGTGT | +1 bp |
| clone 47 | GTAGTCTGCAGTTACCAAGTAGAAGTGCATTCATACCTGTTTTAGTAAATAGTGT |       |

## C

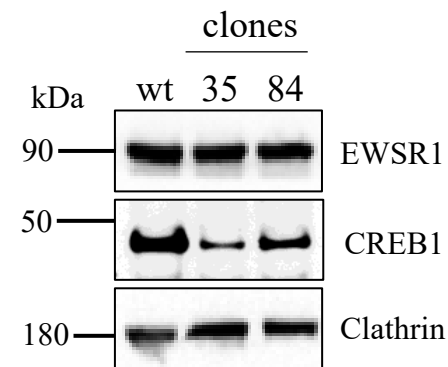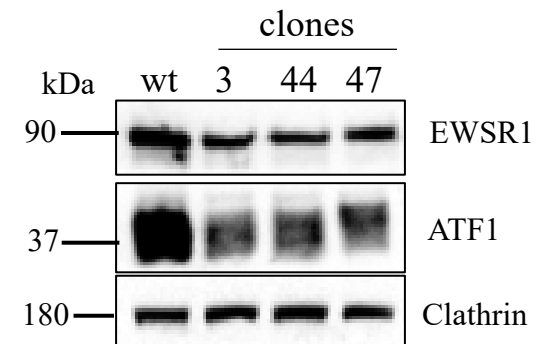

D

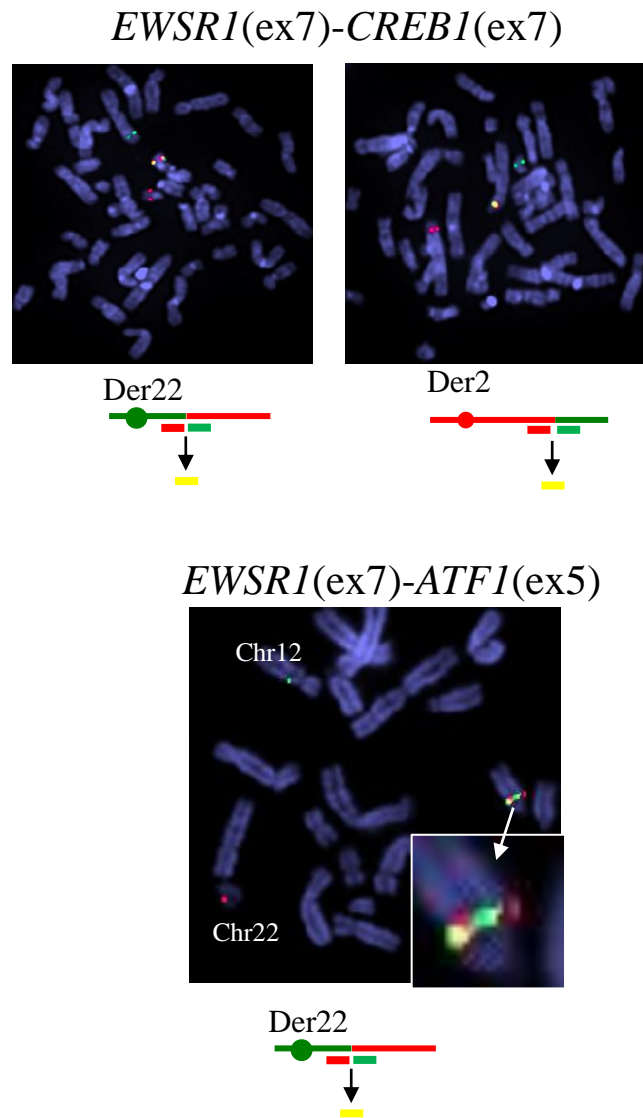

E

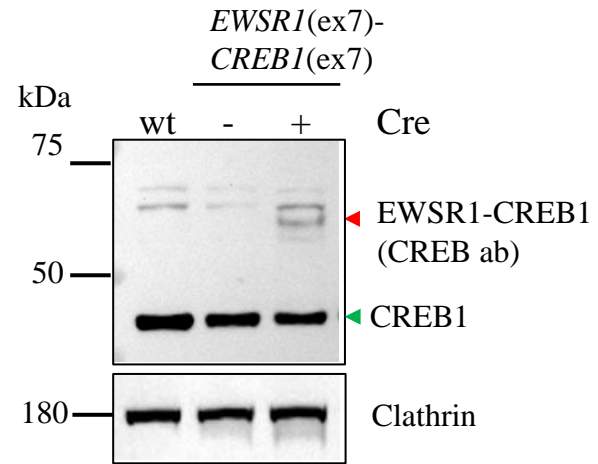

F

hES

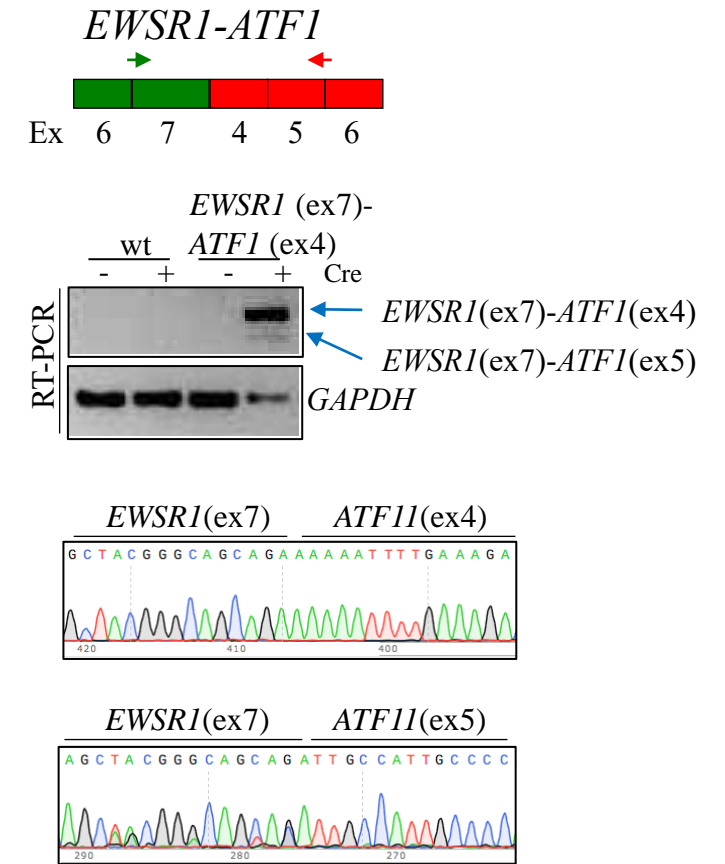

Supplement: NIHMS1704969-supplement-Supplementary_Figure_3.pdf [file NIHMS1704969-supplement-Supplementary_Figure_3.pdf]
